# Supplementary material for: Evaluation of Autonomic Nervous System, Saliva Cortisol Levels, and Cognitive Function in Major Depressive Disorder Patients
Source: PubMed Central journal article supplement (PMC5902046; doi:10.1155/2018/7343592), 2018-04-02
Supplement: 7343592.f1.pdf [file 7343592.f1.pdf]

Supplement Data

**Table 1:** Raw Data from 20 Subjects in Control Group.

| SUBJECT CODE | AGE     | GENDER | HR       | SDHR     | MEAN NN  | SDNN     | HF       | LF       | LF/HF    | MEAN PP  | SDPP     | CORTISOL | WCST   |
|--------------|---------|--------|----------|----------|----------|----------|----------|----------|----------|----------|----------|----------|--------|
|              | (years) |        | (BPM)    |          | (ms)     | (ms)     | (Hz)     | (Hz)     | (Hz)     | (mmHg)   | (mmHg)   | (Ug/dL)  | (%ctr) |
| C001         | 26      | F      | 70.6233  | 5.767    | 0.897264 | 69.10113 | 0.437009 | 0.462991 | 0.639543 | 31.80856 | 4.910868 | 0.329    | 69     |
| C002         | 24      | F      | 65.79066 | 5.3097   | 0.898233 | 66.20749 | 0.55049  | 0.40051  | 0.271312 | 33.1223  | 3.607598 | 0.271    | 70     |
| C003         | 26      | M      | 85.40858 | 2.355    | 1.142241 | 68.50932 | 0.663971 | 0.336029 | 0.902167 | 43.9908  | 4.307508 | 0.213    | 87     |
| C004         | 20      | F      | 63.86703 | 6.557902 | 1.097294 | 66.31666 | 0.624424 | 0.475576 | 0.318039 | 26.47209 | 2.833577 | 0.262    | 90     |
| C005         | 37      | M      | 66.64838 | 5.082936 | 0.837319 | 66.49437 | 0.584877 | 0.415123 | 0.54609  | 26.17112 | 2.350638 | 0.225    | 92     |
| C006         | 32      | F      | 72.04973 | 2.980324 | 0.945333 | 70.24593 | 0.661709 | 0.338292 | 0.749761 | 28.22627 | 2.720826 | 0.188    | 89     |
| C007         | 25      | F      | 65.51028 | 2.994    | 0.956729 | 67.19644 | 0.73854  | 0.26146  | 0.394023 | 24.84106 | 0.115914 | 0.356    | 64     |
| C008         | 21      | F      | 61.77083 | 6.159415 | 0.990903 | 71.00621 | 0.70661  | 0.277425 | 0.455207 | 24.91688 | 0.162696 | 0.2995   | 46     |
| C009         | 22      | F      | 73.85259 | 2.500113 | 0.871986 | 75.44298 | 0.679892 | 0.29339  | 0.510822 | 25.02322 | 0.322752 | 0.243    | 77     |
| C010         | 20      | M      | 61.54492 | 8.534771 | 0.823552 | 68.67994 | 0.661688 | 0.320108 | 0.551286 | 43.71474 | 3.267245 | 0.265    | 90     |
| C011         | 32      | F      | 73.4     | 6.619427 | 0.782548 | 68.32869 | 0.831555 | 0.338312 | 0.242567 | 43.9664  | 2.398398 | 0.243    | 67     |
| C012         | 34      | M      | 71.85    | 2.7113   | 0.814429 | 65.17105 | 0.683774 | 0.168445 | 1.10708  | 29.95773 | 2.865005 | 0.221    | 87     |
| C013         | 35      | M      | 80.42    | 6.115804 | 0.726404 | 70.12877 | 0.625178 | 0.516226 | 0.639543 | 36.59945 | 1.882384 | 0.101    | 67     |
| C014         | 36      | F      | 89.7     | 6.165872 | 0.959392 | 69.49337 | 0.4655   | 0.374822 | 1.18823  | 36.19816 | 1.560425 | 0.1795   | 77     |
| C015         | 37      | F      | 88.46    | 5.960649 | 0.757473 | 67.29231 | 0.74384  | 0.5345   | 0.384375 | 38.93836 | 1.807217 | 0.258    | 86     |
| C016         | 25      | F      | 77.74    | 3.989396 | 0.663734 | 70.39447 | 0.636786 | 0.25616  | 0.610385 | 34.42475 | 0.570609 | 0.263    | 83     |
| C017         | 28      | F      | 78.37    | 5.91883  | 0.798856 | 66.20343 | 0.404624 | 0.363214 | 1.51143  | 34.52584 | 0.701798 | 0.1975   | 80     |
| C018         | 34      | F      | 68.65    | 5.900226 | 0.897513 | 67.32389 | 0.520448 | 0.595376 | 0.961423 | 34.66762 | 0.208501 | 0.132    | 50     |
| C019         | 34      | M      | 66.53    | 9.069541 | 0.876678 | 68.98138 | 0.737465 | 0.262535 | 0.395997 | 33.23969 | 6.554491 | 0.096    | 65     |
| C020         | 32      | M      | 87.45    | 9.23229  | 0.680577 | 70.58475 | 0.70528  | 0.29472  | 0.457877 | 35.34168 | 4.816797 | 0.06     | 56     |

**Table 2:** Raw Data from 20 Subjects in MDD Group

| SUBJECT CODE  | TYPE     | AGE     | GENDER | HR       | SDHR     | MEAN NN  | SDNN     | HF       | LF       | LF/HF    | MEAN PP         | SDPP     | CORTISOL | WCST  |
|---------------|----------|---------|--------|----------|----------|----------|----------|----------|----------|----------|-----------------|----------|----------|-------|
|               |          | (years) |        | (BPM)    |          | (ms)     |          | (ms)     |          | (Hz)     | (Hz)            |          |          |       |
| <b>MDD001</b> | Moderate | 34      | Male   | 100.2094 | 22.082   | 0.600007 | 52.97838 | 0.285452 | 0.683723 | 2.61242  | 51.48396        | 11.56542 | 0.75     | 85.69 |
| <b>MDD003</b> | Moderate | 24      | Female | 94.00608 | 11.04298 | 0.640209 | 53.09763 | 0.365145 | 0.621951 | 1.898547 | 50.42157        | 9.885724 | 0.638667 | 84.69 |
| <b>MDD004</b> | Moderate | 34      | Male   | 94.08978 | 12.03713 | 0.637004 | 53.92932 | 0.361839 | 0.642988 | 1.96417  | 50.65219        | 9.885724 | 0.64     | 47.69 |
| <b>MDD007</b> | Severe   | 33      | Female | 102.9251 | 21.10614 | 0.583077 | 52.65059 | 0.27251  | 0.744215 | 2.678893 | 52.26078        | 12.37064 | 0.853333 | 82.69 |
| <b>MDD008</b> | Moderate | 41      | Female | 89.683   | 8.393    | 0.680418 | 55.09763 | 0.393865 | 0.580973 | 1.595653 | 49.73191        | 9.29594  | 0.542667 | 85.69 |
| <b>MDD009</b> | Moderate | 41      | Male   | 101.4409 | 21.10614 | 0.589044 | 52.6884  | 0.283049 | 0.701513 | 2.678893 | 52.12959        | 11.56542 | 0.8      | 51.69 |
| <b>MDD013</b> | Severe   | 40      | Female | 89.98518 | 9.9      | 0.6744   | 54.92196 | 0.389065 | 0.593317 | 1.75032  | 49.77614        | 9.797434 | 0.542667 | 98.69 |
| <b>MDD014</b> | Moderate | 22      | Female | 96.33837 | 16.40111 | 0.62906  | 53.97838 | 0.355791 | 0.67314  | 1.96417  | 50.96069        | 10.12024 | 0.672    | 36.69 |
| <b>MDD015</b> | Moderate | 35      | Female | 83.96518 | 7.009919 | 0.698949 | 56.10535 | 0.445193 | 0.549209 | 1.50184  | <u>47.82162</u> | 7.555456 | 0.439    | 58.69 |
| <b>MDD017</b> | Mild     | 42      | Female | 82.05428 | 6.08     | 0.701038 | 56.92932 | 0.47674  | 0.541071 | 1.37891  | 47.64733        | 5.818441 | 0.41     | 72.69 |
| <b>MDD018</b> | Moderate | 43      | Female | 64.95774 | 3.008218 | 1.336461 | 63.12753 | 0.565869 | 0.458841 | 0.49013  | 42.94451        | 1.903315 | 0.343    | 34.69 |
| <b>MDD021</b> | Moderate | 39      | Male   | 91.36932 | 10.01489 | 0.668231 | 54.84789 | 0.380653 | 0.599548 | 1.75728  | 49.85261        | 9.29594  | 0.56     | 55.69 |
| <b>MDD022</b> | Mild     | 34      | Male   | 84.18781 | 8.128752 | 0.694266 | 56.10535 | 0.400012 | 0.56249  | 1.551572 | 48.14266        | 8.974152 | 0.5      | 42.69 |
| <b>MDD024</b> | Moderate | 40      | Male   | 63.81224 | 2.61     | 1.445153 | 67.02932 | 0.60168  | 0.329862 | 0.671964 | 41.83952        | 0.887803 | 0.325    | 46.69 |
| <b>MDD025</b> | Moderate | 27      | Female | 65.07617 | 3.156676 | 0.797899 | 62.97838 | 0.55697  | 0.459816 | 0.74578  | 44.1284         | 2.375607 | 0.335    | 69.69 |
| <b>MDD026</b> | Moderate | 27      | Male   | 104.2635 | 23.111   | 0.550003 | 52.09763 | 0.198684 | 0.849268 | 3.03919  | 54.36505        | 13.55478 | 0.949333 | 86.69 |
| <b>MDD027</b> | Mild     | 43      | Female | 68.01243 | 3.34     | 0.7488   | 63.42753 | 0.554611 | 0.489855 | 1.04151  | 44.70901        | 3.408658 | 0.358667 | 73.69 |
| <b>MDD028</b> | Mild     | 30      | Female | 68.95181 | 4.43     | 0.736813 | 63.12753 | 0.545016 | 0.497792 | 1.054373 | 45.48193        | 3.477728 | 0.367    | 55.69 |
| <b>MDD029</b> | Moderate | 25      | Female | 104.044  | 22.38    | 0.470503 | 52.30119 | 0.202012 | 0.752279 | 2.866243 | 53.13307        | 13.55478 | 0.906667 | 47.69 |
| <b>MDD030</b> | Moderate | 25      | Female | 99.05418 | 18.06757 | 0.627133 | 52.92196 | 0.30626  | 0.676316 | 2.128763 | 50.9654         | 10.81274 | 0.673333 | 35.69 |

**Optional Table 3:** Previous Raw Data of 30 Subjects in MDD Group (Before Cut off participants of Age above 43 years old.)

| SUBJECT CODE | TYPE     | AGE     | GENDER | HR       | SDHR     | MEAN NN  | SDNN     | HF       | LF       | LF/HF    | MEAN PP  | SDPP     | CORTISOL | WCST  |
|--------------|----------|---------|--------|----------|----------|----------|----------|----------|----------|----------|----------|----------|----------|-------|
|              |          | (years) |        | (BPM)    |          | (ms)     |          | (ms)     |          | (Hz)     |          |          |          |       |
| MDD001       | Moderate | 34      | Male   | 100.2094 | 22.082   | 0.600007 | 52.97838 | 0.285452 | 0.683723 | 2.61242  | 51.48396 | 11.56542 | 0.75     | 85.69 |
| MDD002       | Moderate | 75      | Female | 93.95274 | 10.16018 | 0.653652 | 54.44789 | 0.367208 | 0.619397 | 1.846547 | 50.2726  | 9.797434 | 0.6      | 80.69 |
| MDD003       | Moderate | 24      | Female | 94.00608 | 11.04298 | 0.640209 | 53.09763 | 0.365145 | 0.621951 | 1.898547 | 50.42157 | 9.885724 | 0.638667 | 84.69 |
| MDD004       | Moderate | 34      | Male   | 94.08978 | 12.03713 | 0.637004 | 53.92932 | 0.361839 | 0.642988 | 1.96417  | 50.65219 | 9.885724 | 0.64     | 47.69 |
| MDD005       | Moderate | 44      | Female | 58.03927 | 2.05     | 1.716241 | 69.30119 | 0.65736  | 0.329131 | 0.454682 | 41.01607 | 0.651657 | 0.3      | 52.69 |
| MDD006       | Mild     | 59      | Male   | 87.09429 | 7.110644 | 0.668406 | 55.92196 | 0.397263 | 0.569987 | 1.551707 | 48.5299  | 9.269897 | 0.549333 | 72.69 |
| MDD007       | Severe   | 33      | Female | 102.9251 | 21.10614 | 0.583077 | 52.65059 | 0.27251  | 0.744215 | 2.678893 | 52.26078 | 12.37064 | 0.853333 | 82.69 |
| MDD008       | Moderate | 41      | Female | 89.683   | 8.393    | 0.680418 | 55.09763 | 0.393865 | 0.580973 | 1.595653 | 49.73191 | 9.29594  | 0.542667 | 85.69 |
| MDD009       | Moderate | 41      | Male   | 101.4409 | 21.10614 | 0.589044 | 52.6884  | 0.283049 | 0.701513 | 2.678893 | 52.12959 | 11.56542 | 0.8      | 51.69 |
| MDD010       | Moderate | 60      | Female | 77.08861 | 4.6      | 0.722577 | 60.65059 | 0.48682  | 0.511135 | 1.11878  | 46.65278 | 4.106368 | 0.372    | 37.69 |
| MDD011       | Moderate | 47      | Female | 80.13634 | 6.058379 | 0.702592 | 56.92932 | 0.478517 | 0.540803 | 1.33991  | 47.69736 | 5.557777 | 0.392    | 70.69 |
| MDD012       | Mild     | 54      | Female | 77.51854 | 5.054708 | 0.713502 | 58.6884  | 0.486055 | 0.52073  | 1.15174  | 46.72263 | 4.184179 | 0.377333 | 42.69 |
| MDD013       | Severe   | 40      | Female | 89.98518 | 9.9      | 0.6744   | 54.92196 | 0.389065 | 0.593317 | 1.75032  | 49.77614 | 9.797434 | 0.542667 | 98.69 |
| MDD014       | Moderate | 22      | Female | 96.33837 | 16.40111 | 0.62906  | 53.97838 | 0.355791 | 0.67314  | 1.96417  | 50.96069 | 10.12024 | 0.672    | 36.69 |
| MDD015       | Moderate | 35      | Female | 83.96518 | 7.009919 | 0.698949 | 56.10535 | 0.445193 | 0.549209 | 1.50184  | 47.82162 | 7.555456 | 0.439    | 58.69 |
| MDD016       | Mild     | 53      | Female | 64.01183 | 2.196754 | 1.002075 | 66.10535 | 0.575138 | 0.45768  | 0.458973 | 42.26418 | 2.112088 | 0.34     | 82.69 |
| MDD017       | Mild     | 42      | Female | 82.05428 | 6.08     | 0.701038 | 56.92932 | 0.47674  | 0.541071 | 1.37891  | 47.64733 | 5.818441 | 0.41     | 72.69 |
| MDD018       | Moderate | 43      | Female | 64.95774 | 3.008218 | 1.336461 | 63.12753 | 0.565869 | 0.458841 | 0.49013  | 42.94451 | 1.903315 | 0.343    | 34.69 |
| MDD019       | Moderate | 51      | Female | 83.05428 | 7.047828 | 0.699156 | 56.84789 | 0.416936 | 0.543161 | 1.44868  | 47.9655  | 7.934373 | 0.465    | 76.69 |
| MDD020       | Mild     | 48      | Female | 76.45083 | 4.102423 | 0.726826 | 61.22394 | 0.494119 | 0.504988 | 1.08138  | 46.36796 | 3.760119 | 0.367    | 88.69 |
| MDD021       | Moderate | 39      | Male   | 91.36932 | 10.01489 | 0.668231 | 54.84789 | 0.380653 | 0.599548 | 1.75728  | 49.85261 | 9.29594  | 0.56     | 55.69 |
| MDD022       | Mild     | 34      | Male   | 84.18781 | 8.128752 | 0.694266 | 56.10535 | 0.400012 | 0.56249  | 1.551572 | 48.14266 | 8.974152 | 0.5      | 42.69 |
| MDD023       | Mild     | 45      | Male   | 79.51354 | 5.241433 | 0.705183 | 58.6884  | 0.48427  | 0.52826  | 1.32503  | 46.8755  | 4.424176 | 0.379    | 73.69 |
| MDD024       | Moderate | 40      | Male   | 63.81224 | 2.61     | 1.445153 | 67.02932 | 0.60168  | 0.329862 | 0.671964 | 41.83952 | 0.887803 | 0.325    | 46.69 |
| MDD025       | Moderate | 27      | Female | 65.07617 | 3.156676 | 0.797899 | 62.97838 | 0.55697  | 0.459816 | 0.74578  | 44.1284  | 2.375607 | 0.335    | 69.69 |
| MDD026       | Moderate | 27      | Male   | 104.2635 | 23.111   | 0.550003 | 52.09763 | 0.198684 | 0.849268 | 3.03919  | 54.36505 | 13.55478 | 0.949333 | 86.69 |
| MDD027       | Mild     | 43      | Female | 68.01243 | 3.34     | 0.7488   | 63.42753 | 0.554611 | 0.489855 | 1.04151  | 44.70901 | 3.408658 | 0.358667 | 73.69 |
| MDD028       | Mild     | 30      | Female | 68.95181 | 4.43     | 0.736813 | 63.12753 | 0.545016 | 0.497792 | 1.054373 | 45.48193 | 3.477728 | 0.367    | 55.69 |
| MDD029       | Moderate | 25      | Female | 104.044  | 22.38    | 0.470503 | 52.30119 | 0.202012 | 0.752279 | 2.866243 | 53.13307 | 13.55478 | 0.906667 | 47.69 |
| MDD030       | Moderate | 25      | Female | 99.05418 | 18.06757 | 0.627133 | 52.92196 | 0.30626  | 0.676316 | 2.128763 | 50.9654  | 10.81274 | 0.673333 | 35.69 |
